# Supplementary material for: [Retracted] Kukoamine A Improves Mycoplasma pneumoniae Pneumonia by Regulating miR‐222‐3p/Superoxide Dismutase 2
Source: Hindawi journal article supplement (doi:10.1155/2022/2064013), 2022-01-01

**Supplementary materials**

Supplementary Figure 1 Clinical serum samples from children infected with *Mycoplasma pneumoniae* and normal healthy controls were collected. Then serum exosomes were extracted by ultra-high speed centrifugation. (A) Transmission electron microscope analysis of contents and purity of exosomes. (B) Western blot to assess the abundances of exosomal markers CD81, CD63, and CD9. (C) Exosomes extracted from serum samples of MPP patients and normal healthy controls were incubated with A549 cells (2 × 105 cells) for 4 h in the dark, and then uptake of PKH-67-labeled exosoems by A549 cells was performed.


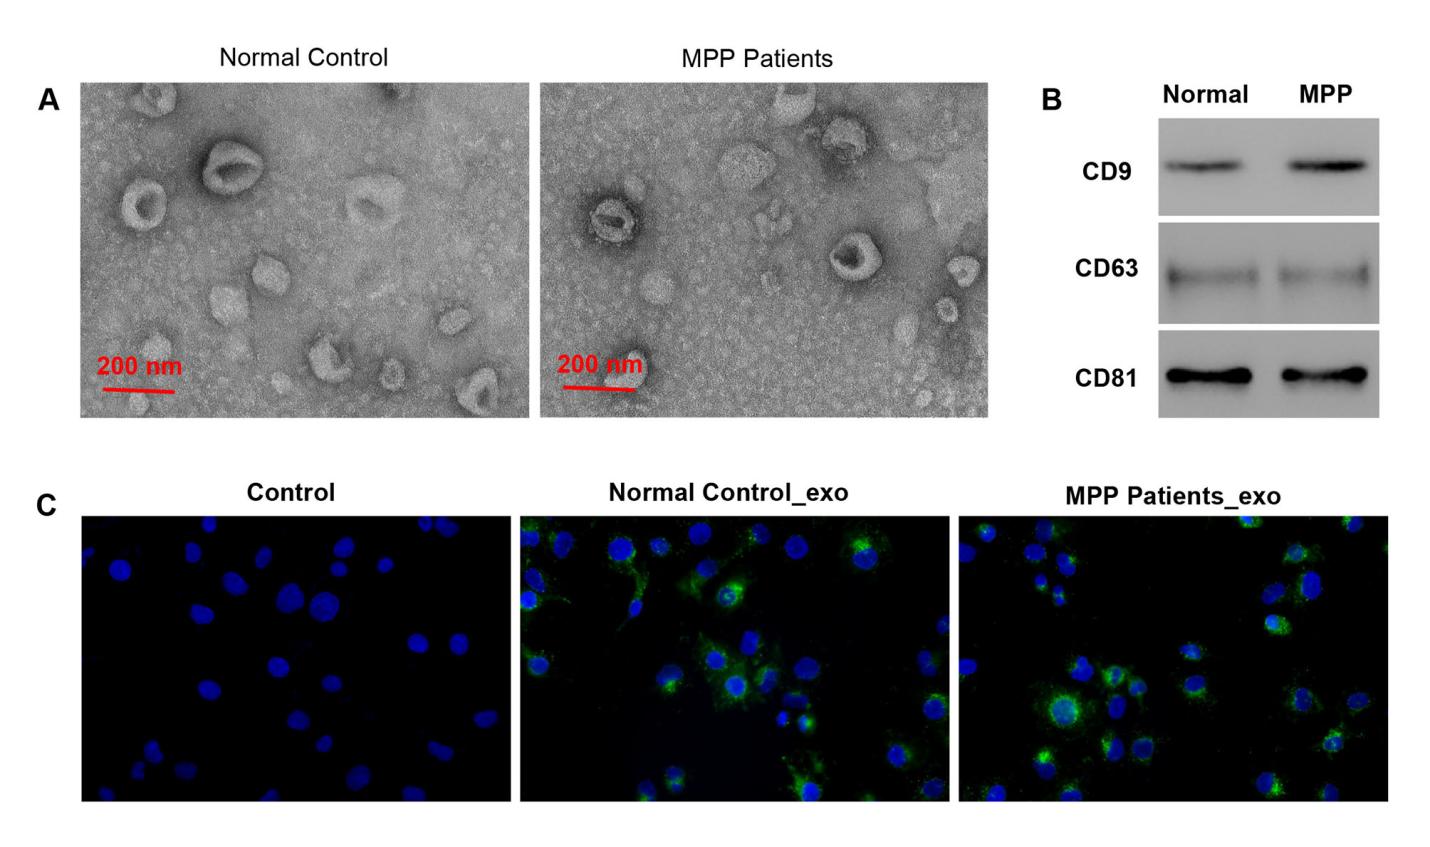


Supplementary Figure 2 Expression level of miR-222-3p in control and MMP patients has been detected. (A) A549 cells were treated with MPP serum exosomes (100 μg/mL) for 6, 12, and 24 h, the parallel extracellular miR-222-3p levels was detected by RT-qPCR. (B) A549 cells were treated with MPP serum exosomes (100 μg/mL) and RNA scavenger, them RNA expression levels of miR-222-3p was detected by RT-qPCR. (C-E) The correlations between the miR-222-3p expression and expression levels of SOD2 (C), IL-6 (D), and TNF-α (E) in the exosomes extracted from serum samples from MPP patients (n = 10).


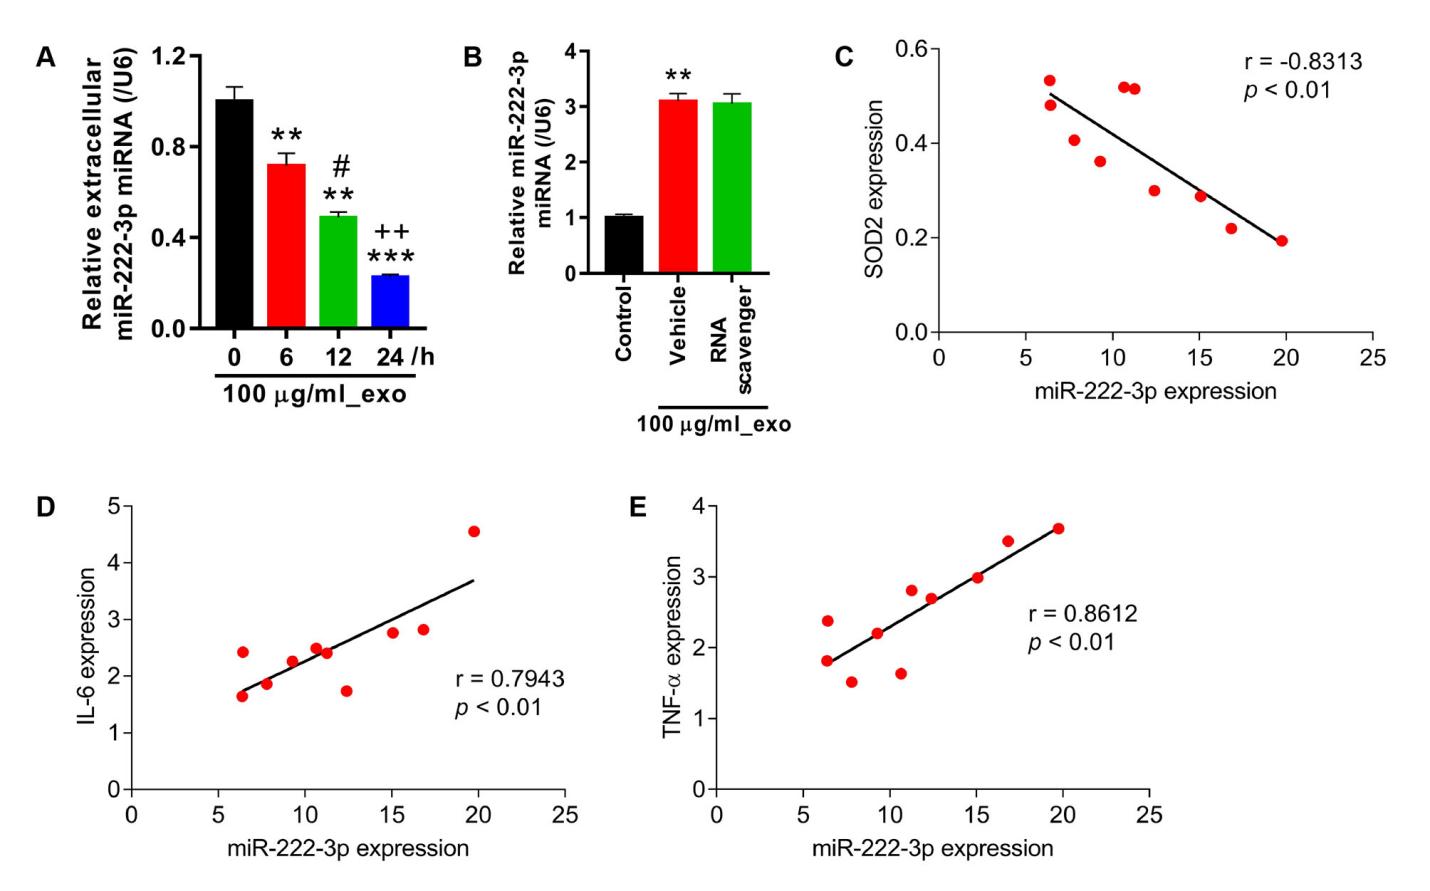


Supplementary Figure 3 SOD2 overexpression plasmid vectors were transfected into A549 cells. RT-qPCR (A) and Western blot (B) were used to discern SOD2 overexpression efficiency. ***P* < 0.01, ****P* < 0.001 *vs*. Vector group.


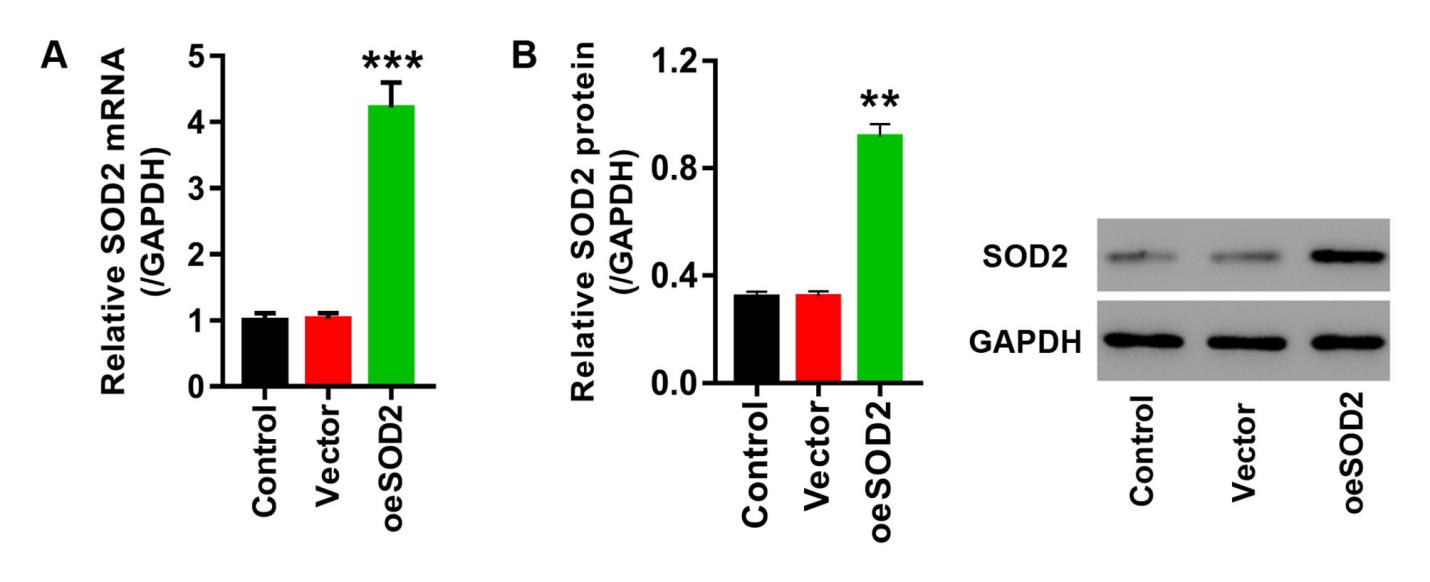


Supplementary Figure 4. Expression level MMPP serum exosomes after co incubation with A549 cell line have been detected followed by in control and MMP patients has been detected KuA treatment. (A-B) RT-qPCR was used to detect the abundances of SOD1 and SOD3. ***P* < 0.01, Control group. #*P* < 0.05 *vs*. 0 group.


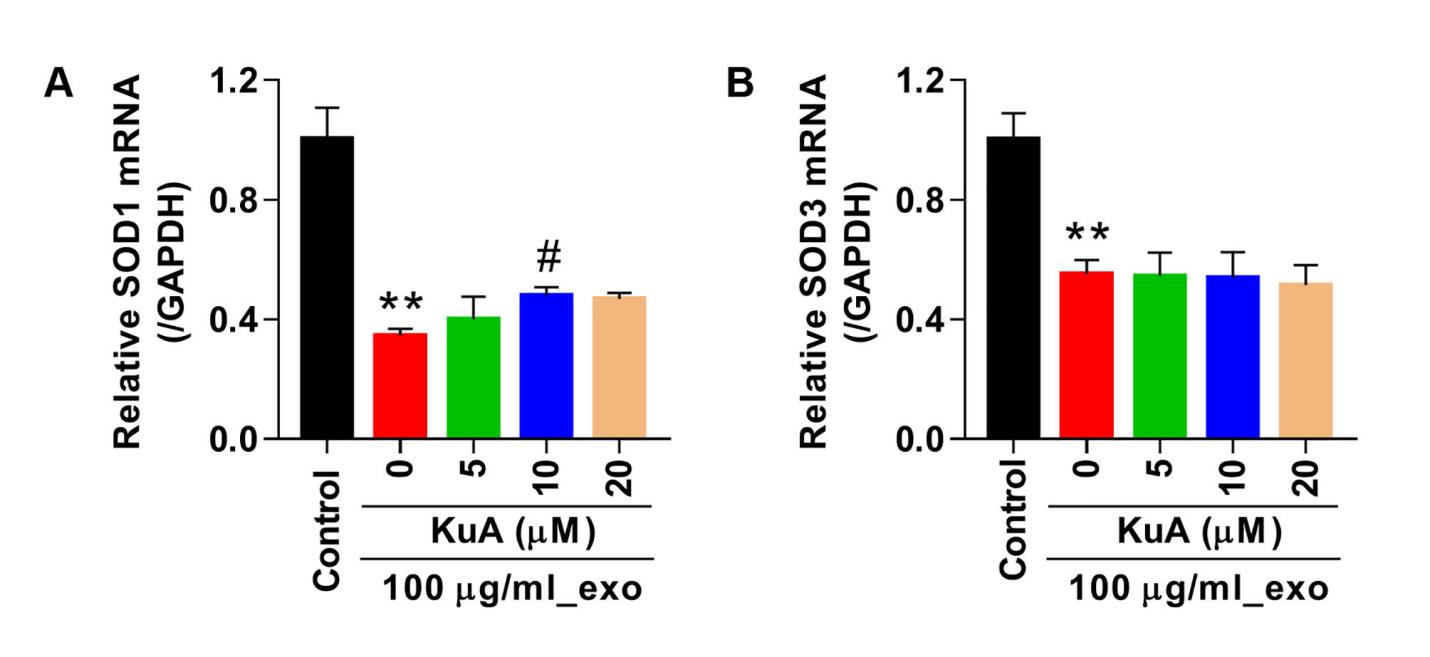

Supplement: f1 [file 2064013.f1.docx]
